# Supplementary figures and images for: Evaluation of Antimicrobial and Anti-Biofilm Formation Activities of Novel Poly(vinyl alcohol) Hydrogels Reinforced with Crosslinked Chitosan and Silver Nano-Particles
Source: MDPI journal article supplement (doi:10.3390/polym14081619), 2022-04-16

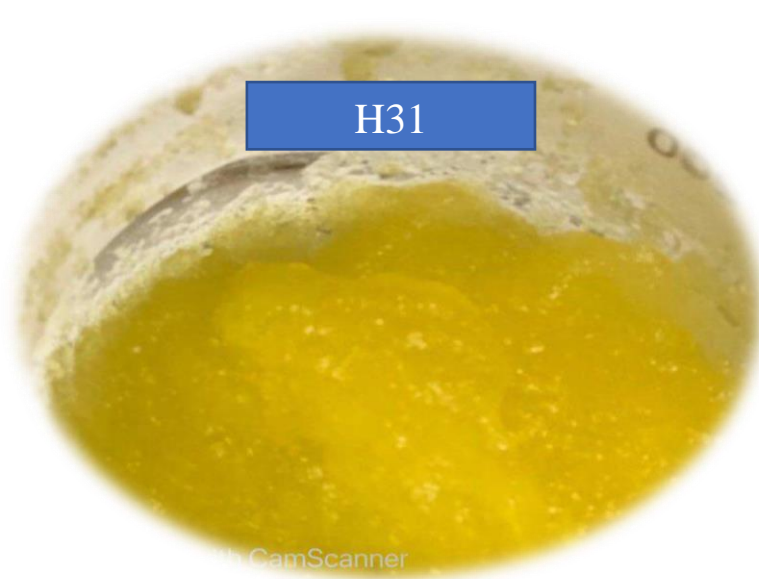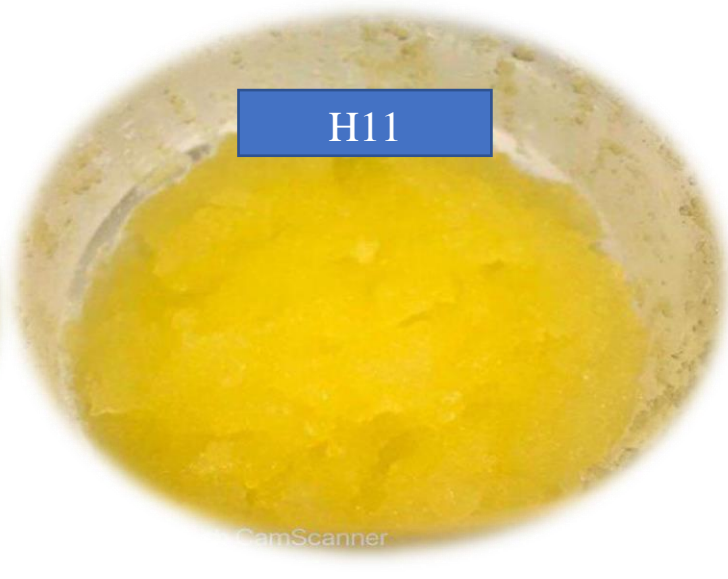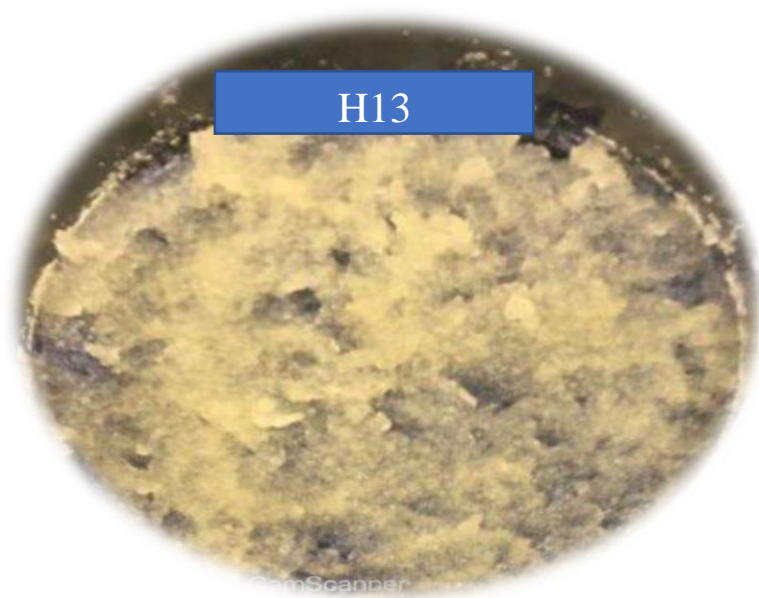

**Online supplemental File**

Normal optical images of the novel hydrogels.

Supplement: s1 [file s1]
